# Supplementary material
Source: Springer Nature journal article supplement (https://www.springermedizin.de/resource/supplementary/13075_2010_2902_MOESM13_ESM.pdf/9693146)

Figure 7

(A)

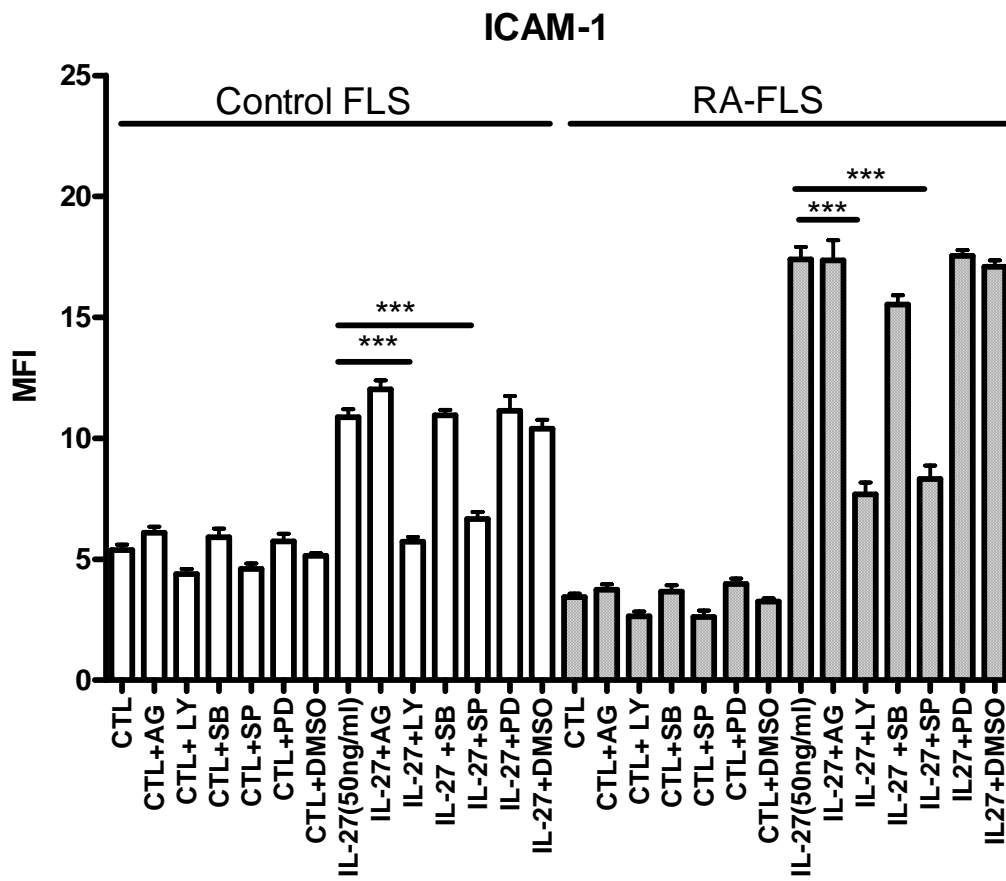

(B)

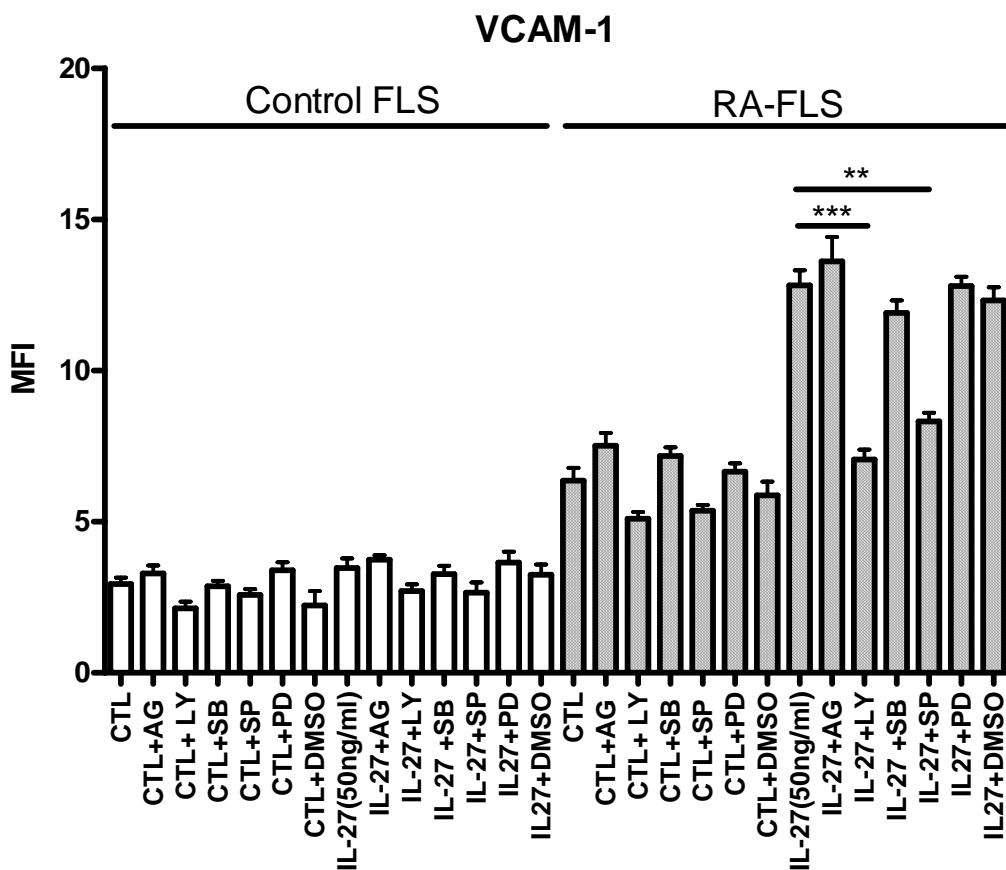

Supplement: MOESM13 [file 9693146]
